# Supplementary material
Source: PubMed Central journal article supplement (PMC7922755)
Supplement: sj-pdf-1-jcb-10.1177_0271678X20918467.pdf [file sj-pdf-1-jcb-10.1177_0271678X20918467.pdf]

**Supplementary table 1. Basic characteristics of included and excluded participants**

| Variable                  | Included (n=1056)  | Excluded (n=530)   | <i>P</i> value |
|---------------------------|--------------------|--------------------|----------------|
|                           | Mean ± SD or N (%) | Mean ± SD or N (%) |                |
| Age (year)                | 55.7±9.1           | 58.7±11.4          | <0.001         |
| Male                      | 378 (35.8%)        | 256 (48.3%)        | <0.001         |
| Current smoker            | 229 (22.5%)        | 152 (29.3%)        | 0.004          |
| Alcohol user              | 272 (26.7%)        | 153 (29.6%)        | 0.251          |
| BMI (kg/m <sup>2</sup> )  | 26.3±3.7           | 26.4±4.0           | 0.673          |
| Hypertension              | 517 (49.5%)        | 316 (60.0%)        | <0.001         |
| SBP (mmHg)                | 133±19             | 136±21             | 0.003          |
| DBP (mmHg)                | 79±11              | 79±12              | 0.521          |
| Hyperlipidemia            | 506 (48.4%)        | 225 (42.7%)        | 0.032          |
| Diabetes Mellitus         | 169 (16.2%)        | 106 (20.1%)        | 0.058          |
| hsCRP (mg/L) <sup>a</sup> | 1.23 (0.62, 2.49)  | 1.13 (0.59, 2.24)  | 0.247          |

Abbreviation: BMI, body mass index; SBP, systolic blood pressure; DBP, diastolic blood pressure; hsCRP, high sensitivity C-reactive protein.

<sup>a</sup>Variable is described as median (interquartile range)
